# Supplementary material for: IL-1α is a DNA damage sensor linking genotoxic stress signaling to sterile inflammation and innate immunity
Source: PubMed Central journal article supplement (PMC4593953; doi:10.1038/srep14756), 2015-10-06

# IL-1 $\alpha$ is a DNA damage sensor linking genotoxic stress signaling to sterile inflammation and innate immunity

Running title: IL-1 $\alpha$  linking genotoxic stress to sterile inflammation

Cohen Idan<sup>1,2\*</sup>, Rider Peleg<sup>3</sup>, Voronov Elena<sup>3</sup>, Tomas Martin<sup>4</sup>, Tudor Cicerone<sup>2</sup>, Wegner Mareike<sup>2,5</sup>, Freudenberg Marina<sup>2,7</sup>, Mittler Gerhard<sup>2</sup>, Ferrando-May Elisa<sup>4</sup>, Charles A. Dinarello<sup>8</sup>, Apte N. Ron<sup>3\*</sup> and Schneider Robert<sup>1\*</sup>.

Supplementary information

## Supplementary figures

**Supplementary Figure 1 (a)** Precursor IL-1 $\alpha$  is expressed in non-treated human HT1080 fibrosarcoma and HaCaT human keratinocyte. Total cell lysates were separated over 15% SDS PAGE and hIL-1 $\alpha$  was detected using mouse anti-hIL-1 $\alpha$  monoclonal antibody. **(b)** The IL-1 $\alpha$  signal increases in the cytoplasm after DNA damage induction. Live cell imaging of B16 melanoma cells expressing GFP-IL-1 $\alpha$  after 100  $\mu$  M H<sub>2</sub>O<sub>2</sub> treatment. Images were collected in intervals for a total period of 4 hours. For every condition (treatment and non treated) a representative region was selected in both the cytoplasm and nucleus for quantification. Averaged fluorescence intensities ( $\sim$ 10 cells) of cytoplasmic regions (left) or nuclear/cytoplasm ratio (right) are plotted as mean  $\pm$  SD of 10 single cell measurements. **(c)** Quantification of IL-1 $\alpha$  co-localization with  $\gamma$ H2AX within DNA damage induced foci. For measuring fluorescence intensities, automatic foci detection using IMARIS software was applied to measure and evaluate fluorescence intensities and co-localization. The quantification of co-localization is expressed as the percentage of positive  $\gamma$ H2AX foci co-localizes with high IL-1 $\alpha$  intensity (e.g. above background of non foci intensities).

**Supplementary Figure 2 (a)** B16 melanoma cells expressing GFP-IL-1 $\alpha$  were irradiated with high UV dose (250 mJ/cm<sup>2</sup>) to induce apoptosis (upper panel). 2-3h post irradiation, GFP-IL-1 $\alpha$  immobile apoptotic foci were visualized by confocal microscopy. For comparison, low UV dose of (5 mJ/cm<sup>2</sup>) was used to show the different foci formation 2h post irradiation upon genotoxic stress (low panel).  $\gamma$ H2AX staining was used to visualize DNA damage foci (red). **(b)** B16 melanoma cells expressing GFP-IL-1 $\alpha$  were UV irradiated at 5 mJ/cm<sup>2</sup> to induce DNA damage. IF using PML specific antibodies was carried out to determine co-localization with IL-1 $\alpha$  under genotoxic stress. White bars, 20  $\mu$  m. **(c)** Detection of apoptotic cell death after genotoxic stress. HT1080 fibrosarcoma or HaCaT keratinocytes were exposed to several genotoxic stresses as in figure 2 (e.g. UV H<sub>2</sub>O<sub>2</sub> and bleomycin). Cell pellets were collected and analyzed for Annexin V-positive staining by Fluorescence Activated Cell Sorting (FACS). Sub-lethal dose of H<sub>2</sub>O<sub>2</sub> (250 $\mu$ M) (high H<sub>2</sub>O<sub>2</sub>) serve as positive control. Data is expressed as mean  $\pm$  SD.

**Supplementary Figure 3 (a)** Precursor IL-1 $\alpha$  K82 point mutants do not effect its transient ectopic expression in B16 mouse melanoma cells. B16 melanoma cells were transfected with the different precIL-1 $\alpha$  GFP vectors and FACS sorted for GFP positive signal. Total protein extracts from 3.5X10<sup>5</sup> cells were separated over 15% SDS PAGE and

precIL-1 $\alpha$  GFP levels were probed with anti GFP rabbit polyclonal antibody. Histones serve as loading control. **(b)** TSA treatment increases nuclear/cytoplasmic IL-1 $\alpha$  ratio. B16 melanoma expressing GFP-IL-1 $\alpha$  were either untreated (control) or treated with TSA 100ng/ml. Images were collected every 30 min for a period of 22h. For every condition, regions of interest were selected in both the cytoplasm and nucleus for ~10 cells. Averaged fluorescence ratios between nuclear and cytoplasmic signal were plotted using Origin 6.0. **(c)** TSA treatment decreases IL-1 $\alpha$  and IL-6 secretion from Raw 264.7 mouse macrophages. TSA (100ng/ml) was added to the cells for 30 min. Growth medium was then replaced with medium containing 100ng/ml LPS. 12h later secreted IL-1 $\alpha$  and IL-6 were measured in supernatants using specific ELISA kits. The experiment was performed in triplicate and data is expressed as mean  $\pm$  SD of the three independent experiments.

**Supplementary Figure 4** Numbers of MMP-9-positive cells **(a)** collagen intensity **(b)** and MPO-positive cells **(c)** in WT or IL-1 $\alpha$  KO IHC. IHC stains were analyzed by ImageJ or manually counted in stains or sections from 4 randomly chosen fields out of 4 independent IHC stains (x400) (4 mice per group) from 3 independent experiments. Results are presented as mean of positive cells or collagen intensity  $\pm$  SD. ns: non-significant, \*P<0.05, \*\*P<0.01 and \*\*\*P<0.001.

**Supplementary video 1.** Nuclear/cytoplasmic shuttling of IL-1 $\alpha$  after DNA damage sensing. Live cell imaging of melanoma cells expressing GFP-IL-1 $\alpha$  during treatment with 100  $\mu$  M H<sub>2</sub>O. First 5s show un-induced cells.

**Supplementary video 2 and 3** IL-1 $\alpha$  localizes to DNA damage sites. Single B16 melanoma cells expressing IL-1 $\alpha$ -GFP were laser microirradiated along a single track for induction of DNA damage. IL-1 $\alpha$  localisation to the site of damage can be seen by increased GFP intensity along intersecting lines. Video 2 and 3 are two independent replicate experiments.

Cohen et al. supplementary fig 1

a

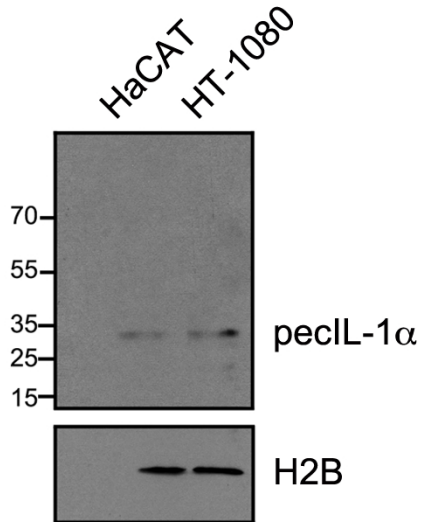

c

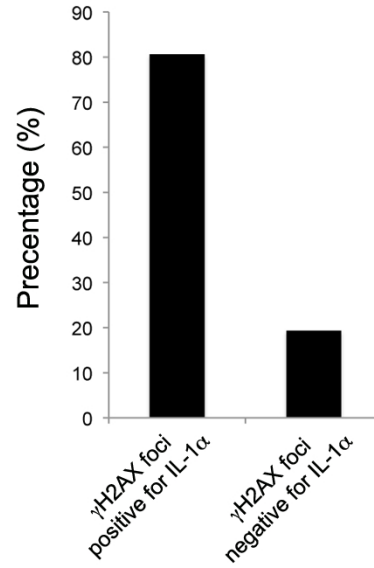

b

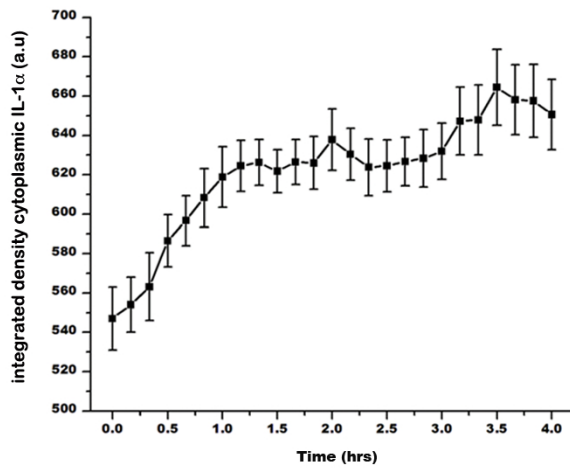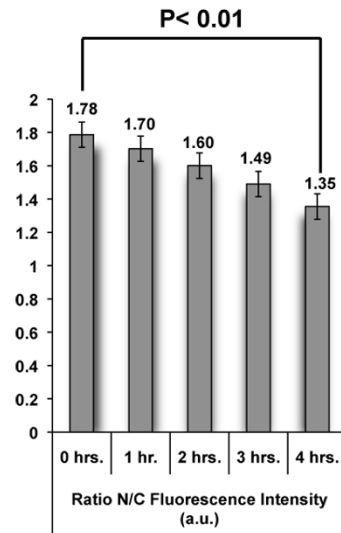

Cohen et al. supplementary fig 2

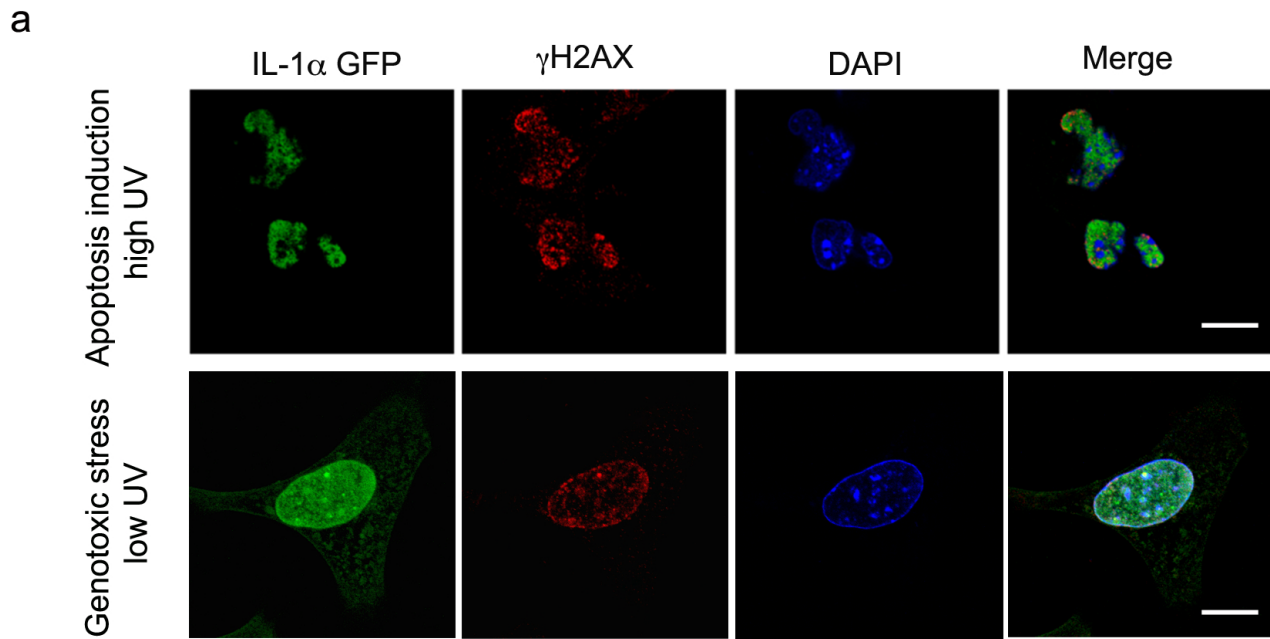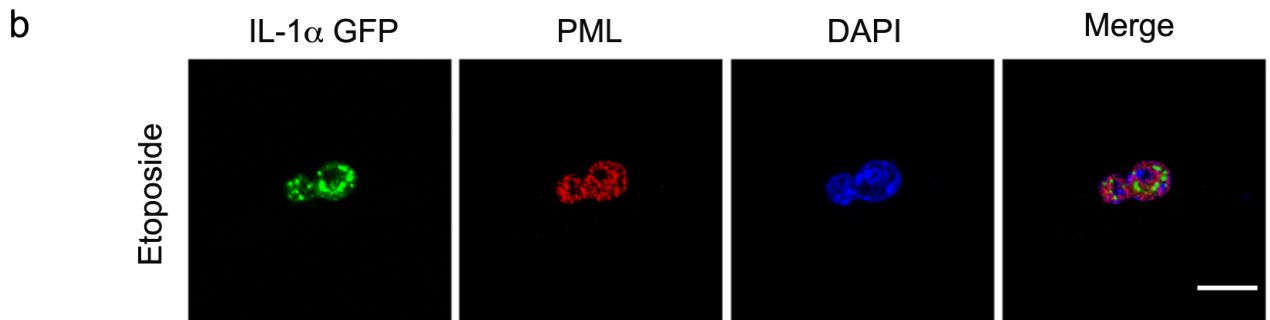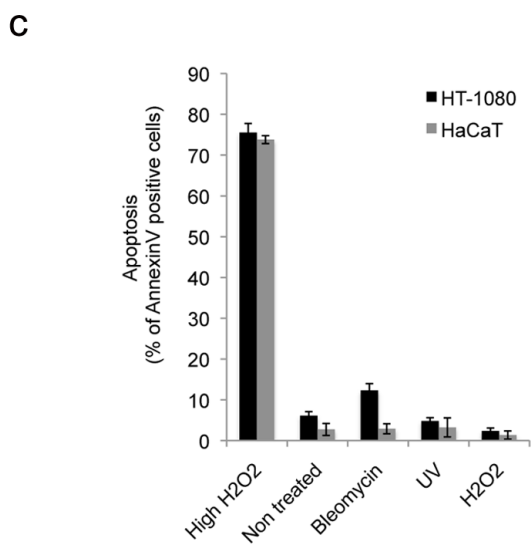

Cohen et al. supplementary fig 3

a

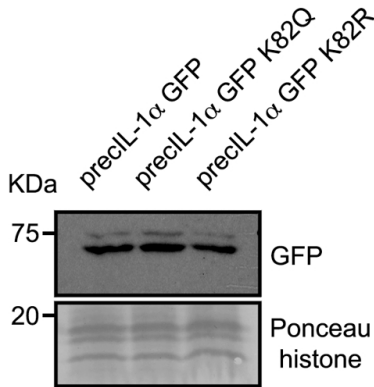

b

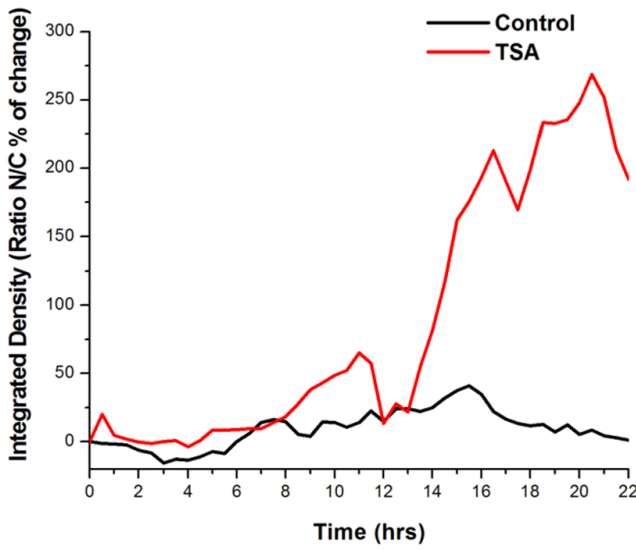

c

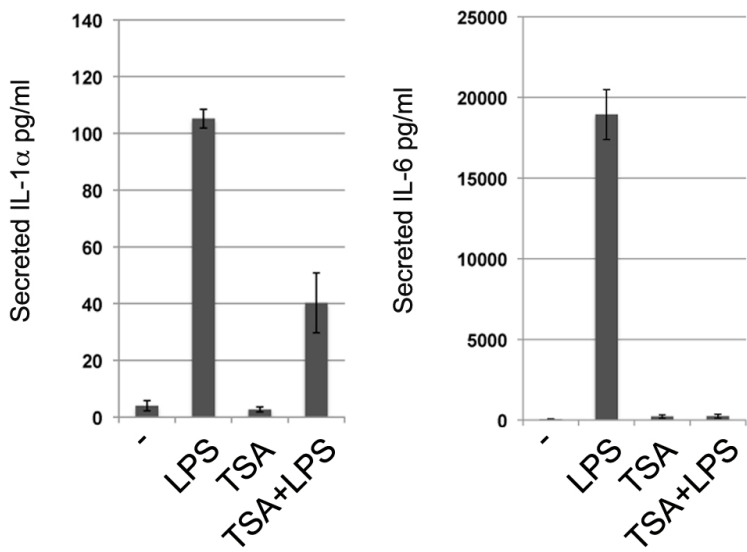

Cohen et al. supplementary fig 4

a

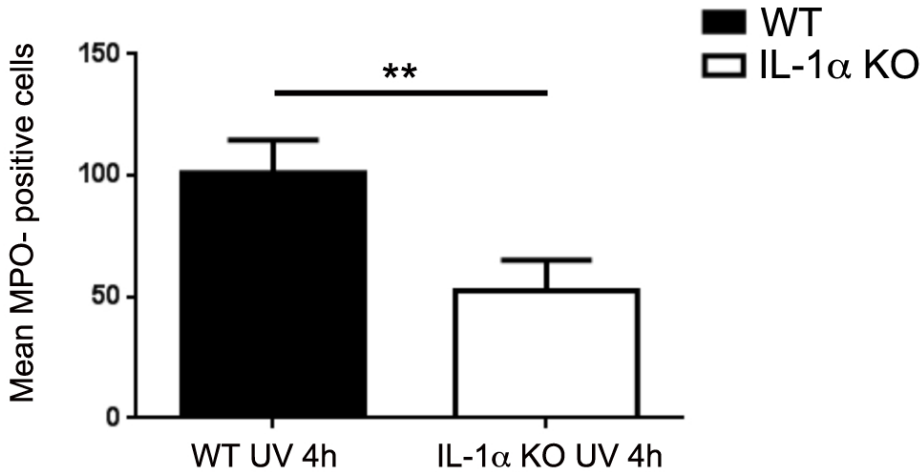

b

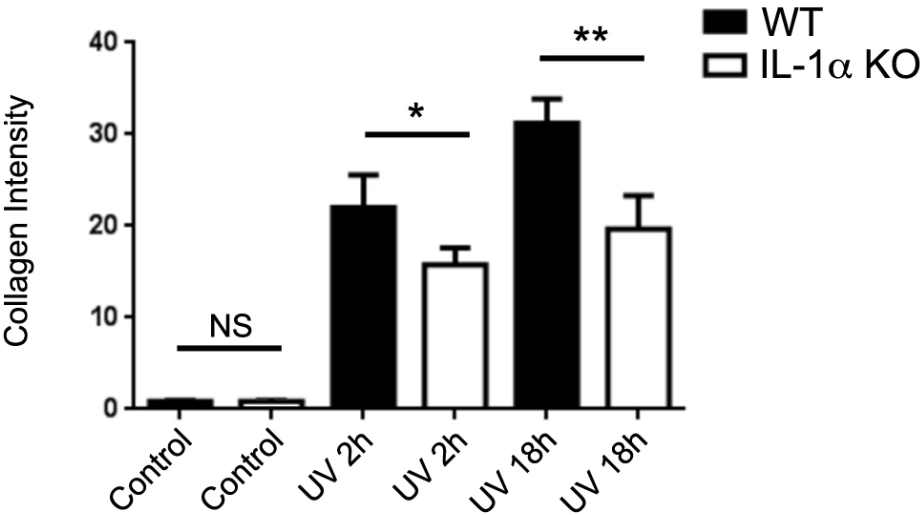

c

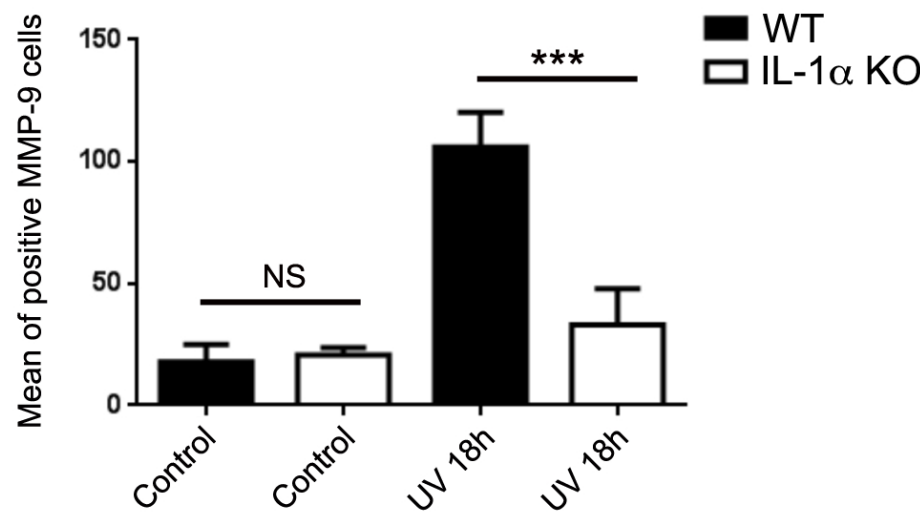

Supplement: srep14756-s1.pdf [file srep14756-s1.pdf]
